# Supplementary material
Source: publisher figshare collection journal article supplement (https://acs.figshare.com/ndownloader/files/3775174)
Supplement: Supplementary file 1 [file 3775174]

# Facile Synthesis of $\text{Na}_{0.33}\text{V}_2\text{O}_5$ Nanosheet-Graphene Hybrids as Ultrahigh Performance Cathode Materials for Lithium Ion Batteries

Yakun Lu,<sup>†,‡</sup> Jun Wu,<sup>†,‡</sup> Jun Liu,<sup>\*,†,‡</sup> Ming Lei,<sup>§</sup> Shasha Tang,<sup>†,‡</sup> Peijie Lu,<sup>†,‡</sup> Linyu Yang,<sup>†,‡</sup>  
Haoran Yang,<sup>†,‡</sup> and Qian Yang<sup>†,‡</sup>

<sup>†</sup> School of Materials Science and Engineering and <sup>‡</sup> Education Ministry Key Laboratory of Non-ferrous Materials Science and Engineering, Central South University, Changsha, Hunan 410083, People's Republic of China

<sup>§</sup> State Key Laboratory of Information Photonics and Optical Communications, Beijing University of Posts and Telecommunications, Beijing 100876, People's Republic of China

## Corresponding Author

\*E-mail: [liujun4982004@csu.edu.cn](mailto:liujun4982004@csu.edu.cn)

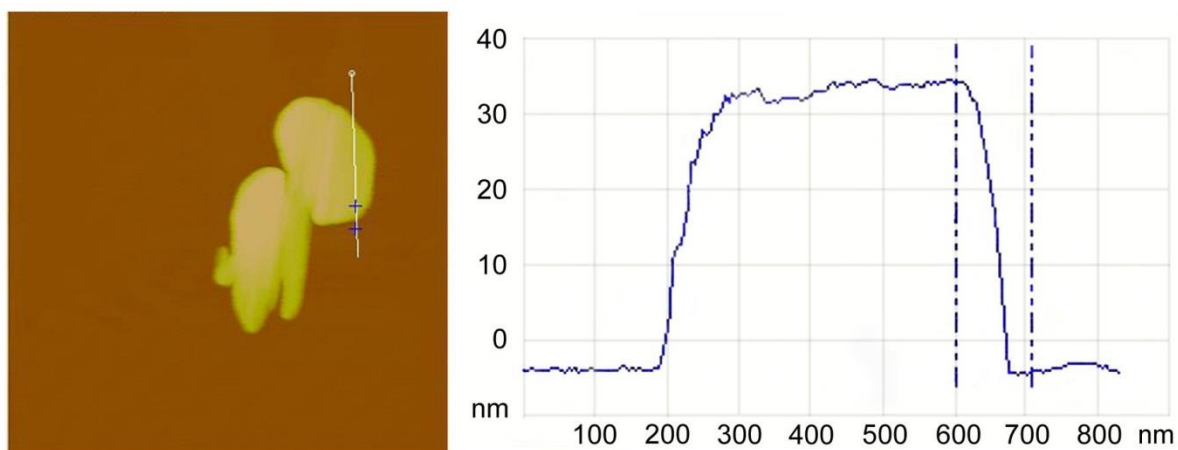

**Fig. S1** AFM image and the corresponding height profile of NVO nanosheets.

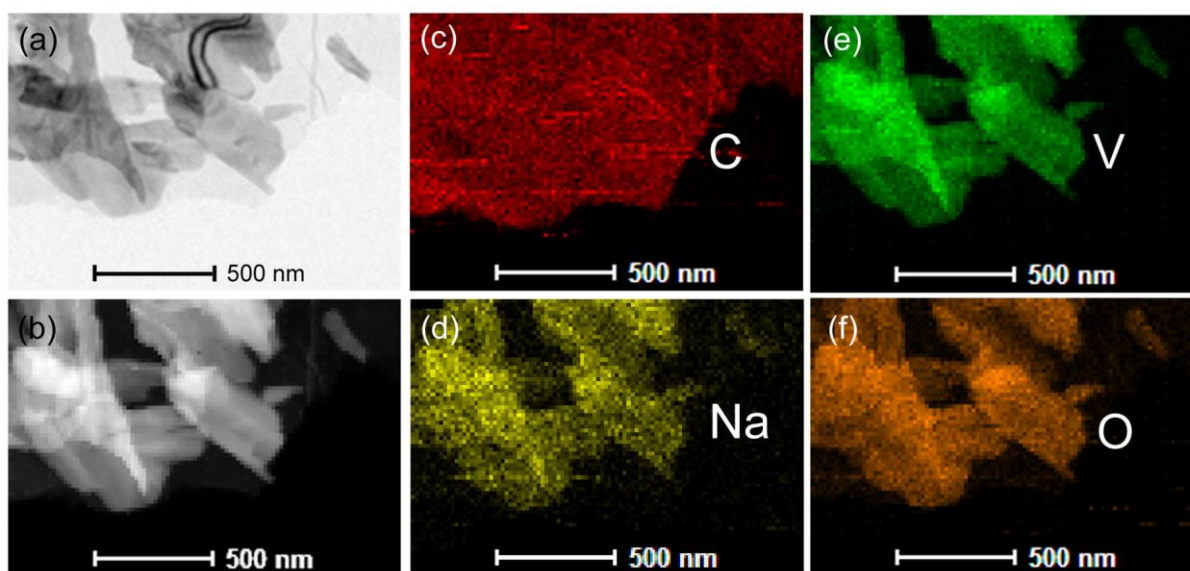

**Fig. S2** (a) BF TEM and (b) HAADF STEM images of NVO-TRG hybrids. (c), (d), (e), and (f) Corresponding EDX mapping images of C (red), Na(yellow), V(green), and O (orange).
